# Supplementary material for: Polyoxometalate-based composite cluster with core–shell structure: Co4(PW9)2@graphdiyne as stable electrocatalyst for oxygen evolution and its mechanism research
Source: Royal Society of Chemistry journal article supplement (doi:10.1039/d2nj01459a), 2022-01-01
Supplement: d2nj01459a1.pdf [file d2nj01459a1.pdf]

Electronic Supplementary Material (ESI) for New Journal of Chemistry.

## Supporting Information

### **Polyoxometalate-based Composite Cluster with Core-Shell Structure: Co<sub>4</sub>(PW<sub>9</sub>)<sub>2</sub>@Graphdiyne as Stable Electrocatalyst for Oxygen Evolution and its Mechanism Research**

Hao Sun,<sup>a</sup> Chaojun Jing,<sup>\*a</sup> Wenhui Shang,<sup>a</sup> Fei Wang,<sup>a</sup> Muling Zeng,<sup>c</sup> Shijie Ju,<sup>c</sup> Kai  
Li,<sup>\*b</sup> Zhiyu Jia<sup>\*a</sup>

<sup>a</sup> MOE Key Laboratory of Cluster Science, Key Laboratory of Photoelectronic  
/Electrophotonic Conversion Materials, School of Chemistry and Chemical  
Engineering, Beijing Institute of Technology, Beijing 100081, P. R. China. E-mail:  
jzy@bit.edu.cn, jingcj@bit.edu.cn.

<sup>b</sup> State Key Laboratory of Rare Earth Resource Utilization, Changchun Institute of  
Applied Chemistry, Chinese Academy of Sciences, Changchun 130022, P. R. China.  
E-mail: likai@ciac.ac.cn.

<sup>c</sup> School of Biotechnology and Health Sciences, Wuyi University, Jiangmen 529020,  
P. R. China.

## 1. Equipment, chemicals and reaction conditions

**Single crystal X-ray diffraction** of  $\text{Co}_4(\text{PW}_9)_2$  microcrystal data was obtained by Bruker D8 Venture X-ray diffraction.

**Scanning electron microscopy (SEM)** images and **energy dispersive X-ray spectroscopy (EDS)** data were obtained through Zeiss Supra 55 SAPPHIRE SEM equipment with an EDS detector.

**Transmission electron microscopy (TEM)** and **high-resolution transmission electron microscopy (HRTEM)** images and corresponding **element mapping** were acquired by JEOL JEM-2100F transmission electron microscope

**Powder X-ray diffraction (PXRD)** data were detected on a Rigaku XRD-6000 diffractometer under the following conditions: 40 kV, 40 mA, Cu  $K\alpha$  radiation ( $\lambda = 0.154$  nm).

**Raman spectroscopy** is recorded on a Renishaw Raman spectrometer at a laser excitation wavelength of 532 nm.

**X-ray photoelectron spectroscopy (XPS)** plots are obtained by monochromatized Al  $K\alpha$  exciting X-radiation (PHI Quantera SXM).

**Electrochemical techniques** are carried out on a CH instruments CHI 760E electrochemical workstation with a standard three-electrode cell, where  $\text{Co}_4(\text{PW}_9)_2@\text{GDY}$  as the working electrode, graphite rod as the counter electrode and saturated calomel electrode (SCE) as the reference electrode.

**Thermogravimetric Analysis (TGA)** data was acquired using a TG/DSC 1/1100 SF from METTLER TOLEDO under  $\text{N}_2$  flow at a heating rate of  $10^\circ\text{C min}^{-1}$ .

**Thin layer chromatography (TLC)** was performed using Merck aluminium-backed plates of TLC Silica gel 60 F<sub>254</sub>; the plates were revealed using UV light.

**Column chromatography** was accomplished using silica gel (60 Å pore size, 230-400 µm mesh size).

**Nuclear Magnetic Resonance (NMR)** Spectrum were recorded using Bruker Avance 400 spectrometers (Analysis & Testing Center, Beijing Institute of Technology).

**Reagents and chemicals** are used as received without further purification. Dichloromethane and diethyl ether were used as received. Tetrahydrofuran was dried by passing through a column of activated molecular sieves using a solvent purification system. All water used was purified with a Millipore system (typically 18.2 MΩ cm resistivity).

**Reaction conditions** was conducted under inert atmosphere by nitrogen when using a standard Schlenk line technique. All other reactions were performed employing standard organic synthesis protocols.

## 2. Synthetic procedures

### 2.1 Preparation of $\text{Co}_4(\text{PW}_9)_2$ microcrystal

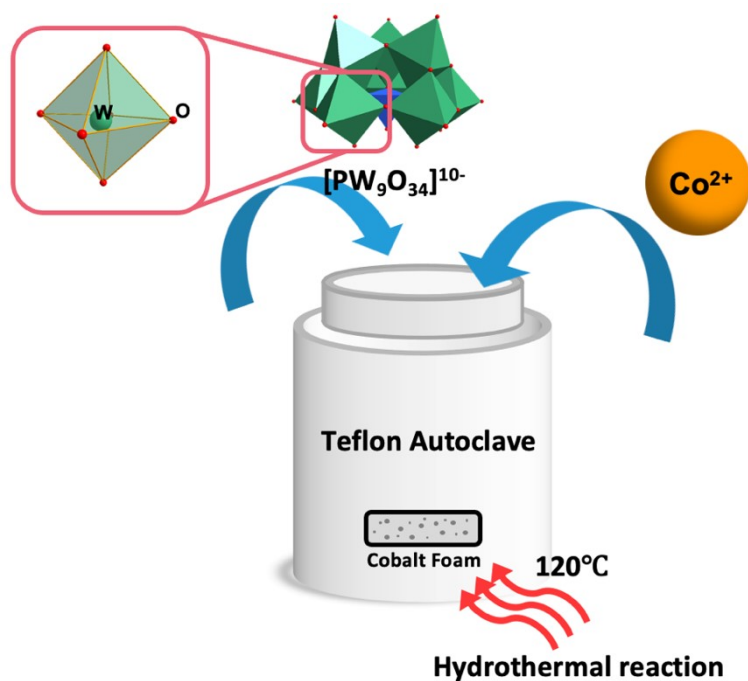

**Fig. S1.** Illustration of preparing  $\text{Co}_4(\text{PW}_9)_2$  microcrystal under hydrothermal reaction

$\text{Co}(\text{NO}_3)_2 \cdot 6\text{H}_2\text{O}$  (0.2 mmol),  $\text{Na}_9[\text{A-}\alpha\text{-PW}_9\text{O}_{34}] \cdot 7\text{H}_2\text{O}$  (0.1 mmol) and KCl (1.00 mmol) were mixed in deionized  $\text{H}_2\text{O}$  (10 mL) in a 25 mL Teflon autoclave and stirring for half an hour, then the pH value of the mixture was adjusted to 7.5 by 1M HCl and 1M NaOH. Teflon autoclave was then heated to 120 °C for 6 h and cooling successively in room temperature and 4 °C overnight. The amount of KCl and suitable pH are discussed at large in Fig. S2 and S3.

## 2.2 Synthesis of hexakis[(trimethylsilyl)ethynyl]benzene (HEB-TMS).

HEB-TMS as the precursor of all-carbon GDY was synthesized according to the reported route shown in Scheme. S1.<sup>[1]</sup> First, 20 mL anhydrous THF and 4.24 mL trimethylsilylacetylene (30 mmol) was added to N<sub>2</sub>-filled Schlenk flask which was put into -78 °C condition, then 2.51 mL n-BuLi (30 mmol) was added dropwise into the mixture and stirred for 1 h. Second, 4.0894g ZnCl<sub>2</sub> (30 mmol) was added into the reacted solution and stirred for 3 h, the low temperature condition was removed at same time to bring the reaction temperature back to the room temperature, [(trimethylsilyl)ethynyl]zinc chloride was obtained when the reaction completed.<sup>[2]</sup> Third, 2.7574g hexabromobenzene (5 mmol), 1.1556g Pd(PPh<sub>3</sub>)<sub>4</sub> (1 mmol) and 20 mL anhydrous toluene were added, then the mixture was stirred at 80 °C for 72 h under N<sub>2</sub> atmosphere. Finally, after 30 mL 1 M HCl was added to the reaction, the mixture was extracted with ethyl acetate for three times, and the organic phase was collected and washed with brine and dried with anhydrous MgSO<sub>4</sub>, then dried organic phase was evaporated, and the residue was purified by column chromatography with silica gel (petroleum ether as eluent). HEB-TMS was separated as pale-yellow powder, the <sup>1</sup>H NMR and <sup>13</sup>C NMR of HEB-TMS were shown in Fig. S4 and Fig. S5. <sup>1</sup>H NMR (400 MHz, CDCl<sub>3</sub>) δ 0.12 (s, 54H). <sup>13</sup>C NMR (101 MHz, CDCl<sub>3</sub>) δ 127.95 (C=C), 105.19 (C≡C), 100.99 (C-Si), 0.28 (Si-CH<sub>3</sub>).

### 2.3 Synthesis of $\text{Co}_4(\text{PW}_9)_2@\text{GDY}$ electrode.

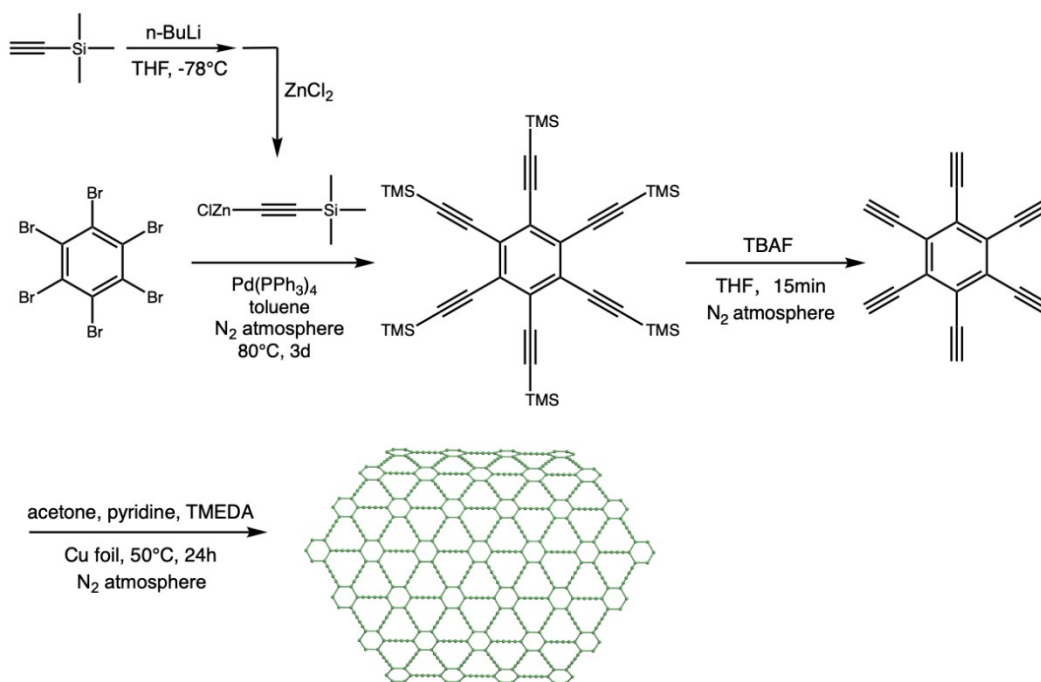

**Scheme S1.** The synthesis route for GDY

### 3. Results and Discussion

#### 3.1 Favorable pH value for preparation $\text{Co}_4(\text{PW}_9)_2$ microcrystal and correspond SEM images

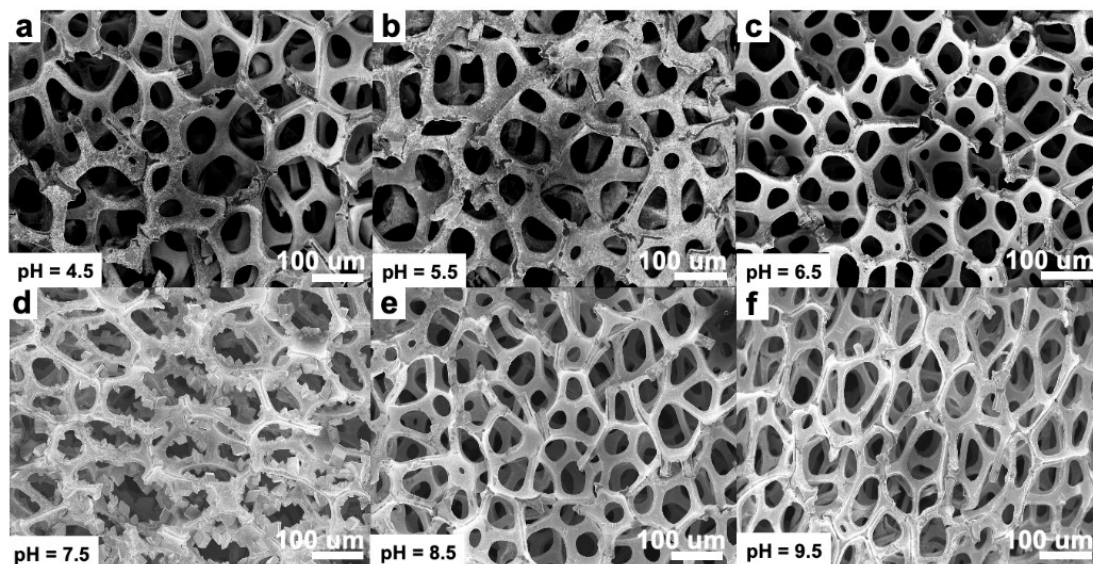

**Fig. S2.** The SEM images of preparation  $\text{Co}_4(\text{PW}_9)_2$  microcrystal under different pH conditions

$\text{Co}(\text{NO}_3)_2 \cdot 6\text{H}_2\text{O}$  (0.2 mmol),  $\text{Na}_9[\text{A}-\alpha\text{-PW}_9\text{O}_{34}] \cdot 7\text{H}_2\text{O}$  (0.1 mmol) and KCl (1.00 mmol) were mixed in deionized  $\text{H}_2\text{O}$  (10 mL) in a 25 mL Teflon autoclave and stirred for half an hour, and then the pH value of the mixtures were adjusted to 4.5, 5.5, 6.5, 7.5, 8.5, 9.5 by 1M HCl and 1M NaOH. Then Teflon autoclave was heated to 120 °C for 6 h and then cooling in room temperature and 4 °C overnight successively. The SEM images of preparing  $\text{Co}_4(\text{PW}_9)_2$  microcrystal under different pH, Figure S2 exhibits that merely when pH=7.5 can  $\text{Co}_4(\text{PW}_9)_2$  microcrystal formed.

### 3.2 Favorable amount of KCl for preparation $\text{Co}_4(\text{PW}_9)_2$ microcrystal and correspond SEM images

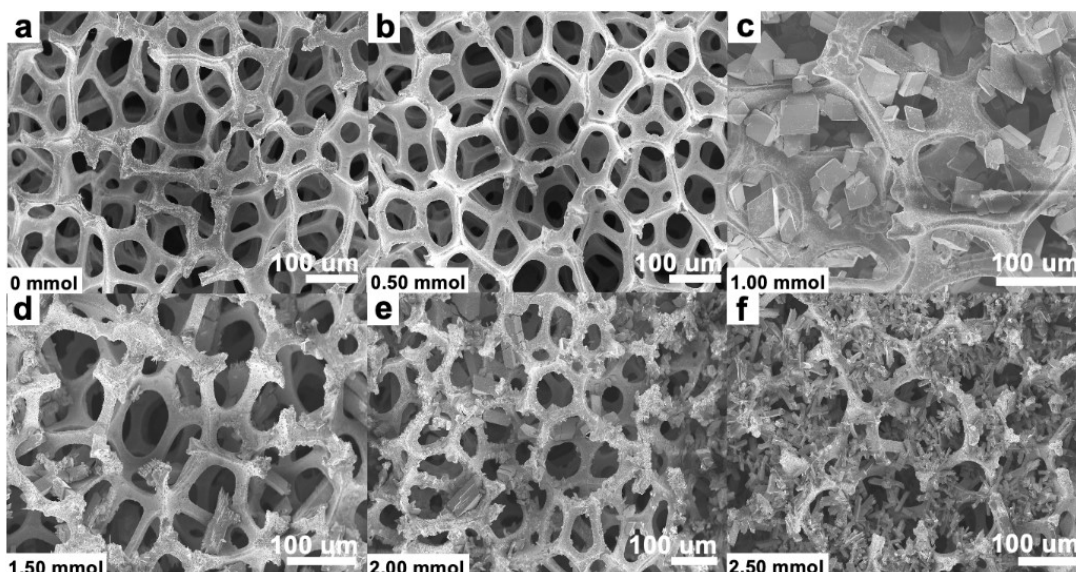

**Fig. S3.** The SEM images of preparation  $\text{Co}_4(\text{PW}_9)_2$  microcrystal with different amount of KCl

$\text{Co}(\text{NO}_3)_2 \cdot 6\text{H}_2\text{O}$  (0.2 mmol),  $\text{Na}_9[\text{A}-\alpha\text{-PW}_9\text{O}_{34}] \cdot 7\text{H}_2\text{O}$  (0.1 mmol) were mixed in deionized  $\text{H}_2\text{O}$  (10 mL) in a 25 mL Teflon autoclave, then different amount of KCl (0, 0.50, 1.00, 1.50, 2.00 and 2.50 mmol) were added to the mixture. The pH value was fixed at 7.5. After proceeding the same heating and cooling conditions with former, different morphologies of  $\text{Co}_4(\text{PW}_9)_2$  were obtained and observed through SEM in Fig. S3. Only when the amount of KCl added in the mixture is 1.00 mmol, will best morphology of  $\text{Co}_4(\text{PW}_9)_2$  microcrystal be formed.



### 3.3 $^1\text{H}$ -NMR spectrum of HEB-TMS

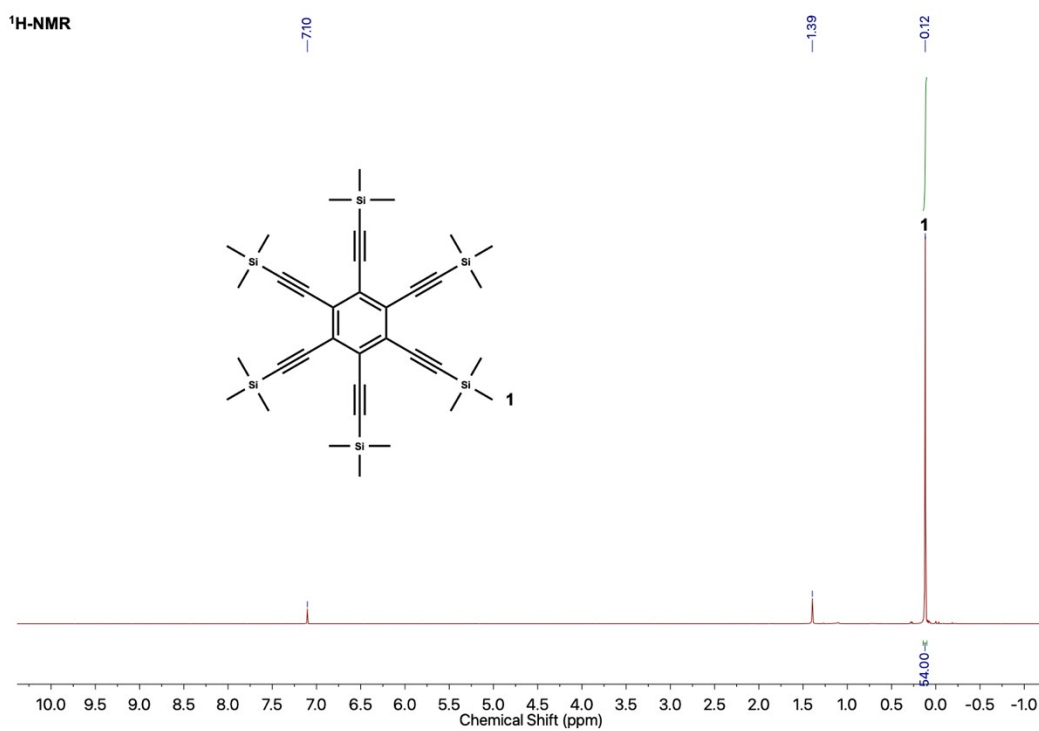

**Fig. S4.**  $^1\text{H}$ -NMR spectrum of HEB-TMS

$^1\text{H}$  NMR (400 MHz,  $\text{CDCl}_3$ )  $\delta$  0.12 (s, 54H).

### 3.4 $^{13}\text{C}$ -NMR spectrum of HEB-TMS

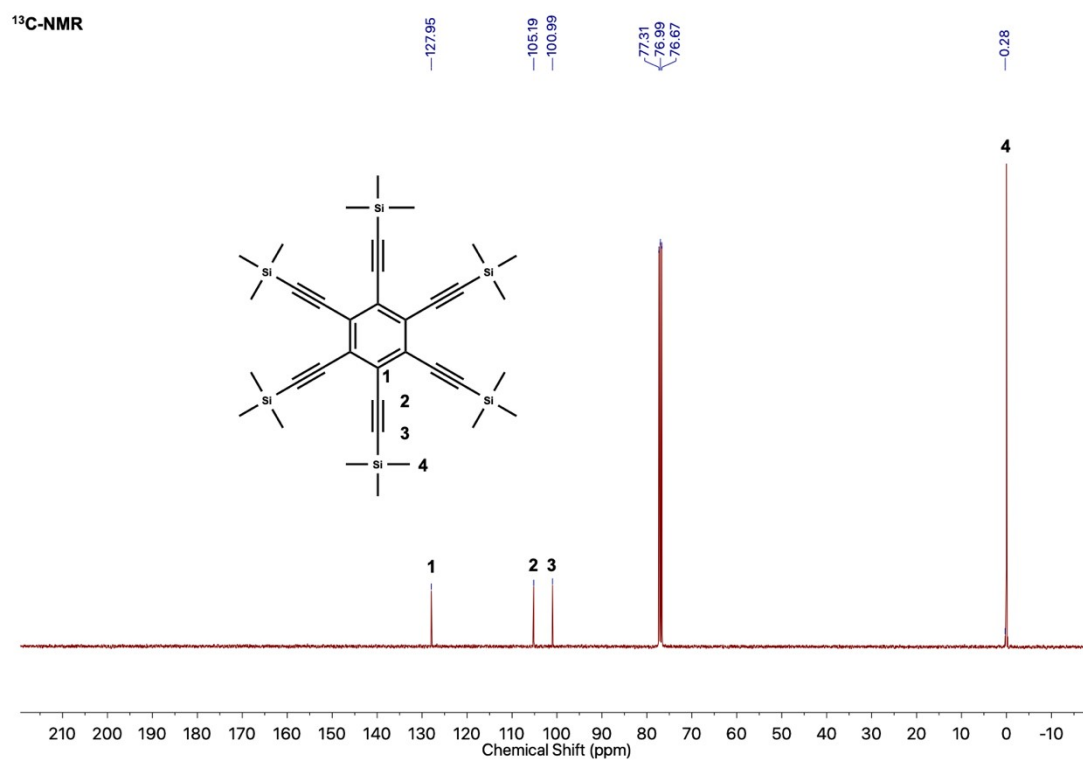

**Fig. S5.**  $^{13}\text{C}$ -NMR spectrum of HEB-TMS

$^{13}\text{C}$  NMR (101 MHz,  $\text{CDCl}_3$ )  $\delta$  127.95 (C=C), 105.19 (C≡C), 100.99 (C-Si), 0.28 (Si-CH<sub>3</sub>).

### 3.5 Crystallographic data of Co<sub>4</sub>(PW<sub>9</sub>)<sub>2</sub>

| Co <sub>4</sub> (PW <sub>9</sub> ) <sub>2</sub>       |                                                                                                       |
|-------------------------------------------------------|-------------------------------------------------------------------------------------------------------|
| formula                                               | K <sub>10</sub> [Co <sub>4</sub> (PW <sub>9</sub> O <sub>34</sub> ) <sub>2</sub> ]·24H <sub>2</sub> O |
| Formula weight                                        | 5518.34                                                                                               |
| crystal size[mm <sup>3</sup> ]                        | 0.25×0.22×0.18                                                                                        |
| Crystal color                                         | purple                                                                                                |
| crystal system                                        | monoclinic                                                                                            |
| space group                                           | P 21/n                                                                                                |
| a [Å]                                                 | 12.365 (6)                                                                                            |
| b [Å]                                                 | 21.330 (11)                                                                                           |
| c [Å]                                                 | 15.827 (8)                                                                                            |
| α [°]                                                 | 90                                                                                                    |
| β [°]                                                 | 92.395 (15)                                                                                           |
| γ [°]                                                 | 90                                                                                                    |
| Volume [Å <sup>3</sup> ]                              | 4170 (4)                                                                                              |
| Z                                                     | 2                                                                                                     |
| Dcalc. [mg·m <sup>-3</sup> ]                          | 4.394                                                                                                 |
| μ[mm <sup>-1</sup> ]                                  | 26.145                                                                                                |
| <i>F</i> <sub>000</sub>                               | 4888.0                                                                                                |
| □ range[°]                                            | 3.206 to 58.996                                                                                       |
| Reflections                                           | 42967                                                                                                 |
| collected                                             |                                                                                                       |
| Independent                                           | 11593                                                                                                 |
| reflections                                           |                                                                                                       |
| <i>R</i> (int)                                        | 0.0710                                                                                                |
| Completeness                                          | 0.998                                                                                                 |
| Data/restraints/parameters                            | 11593/121/616                                                                                         |
| Goodness-of-fit on <i>F</i> <sup>2</sup>              | 1.020                                                                                                 |
| Final <i>R</i> indices<br>[ <i>I</i> >2σ( <i>I</i> )] | <i>R</i> <sub>1</sub> = 0.0370, <i>wR</i> <sub>2</sub> = 0.0923                                       |
| <i>R</i> indices (all data)                           | <i>R</i> <sub>1</sub> = 0.0492, <i>wR</i> <sub>2</sub> = 0.0996                                       |
| Largest diff. peak<br>and hole/e.Å <sup>-3</sup>      | 3.37/-3.92                                                                                            |

**Table S1.** Crystallographic data and structure refinements

### **3.6 Thermogravimetric analysis (TGA) of $\text{Co}_4(\text{PW}_9)_2$**

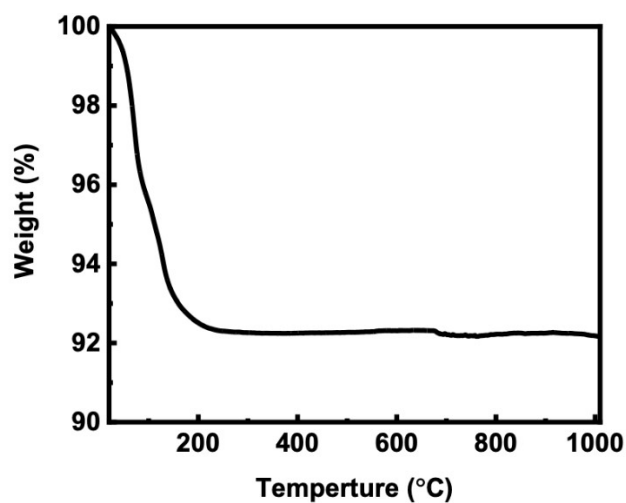

**Fig. S6.** TGA plot of  $\text{Co}_4(\text{PW}_9)_2$

$\text{Co}_4(\text{PW}_9)_2$  will lose water molecules under the heating process, the weight loss of  $\text{Co}_4(\text{PW}_9)_2$  is about 8 wt%. From the thermogravimetric curve, we can calculate the loss of water molecules is about 24, to determine the final chemical formula:  $\text{K}_{10}[\text{Co}_4(\text{PW}_9\text{O}_{34})_2] \cdot 24\text{H}_2\text{O}$ .

### 3.7 The SEM image of blank CF with porous structure

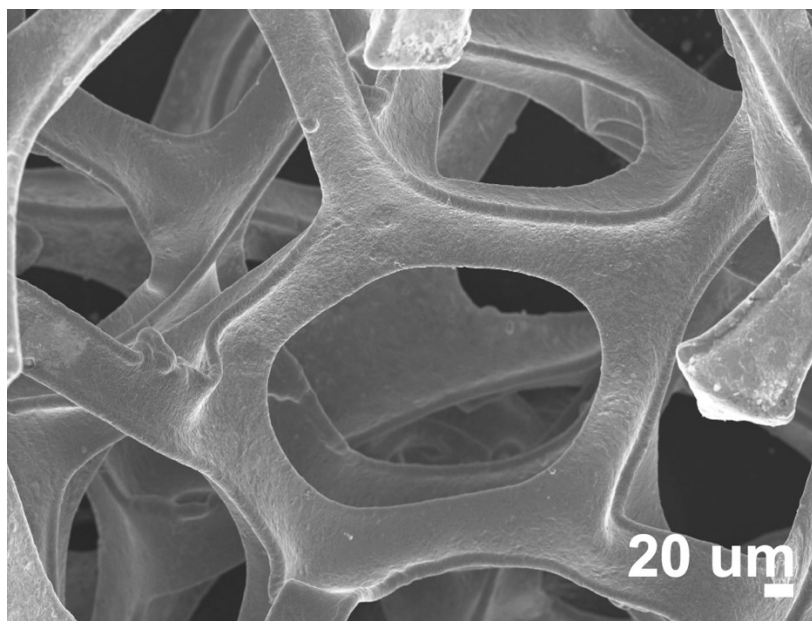

**Fig. S7.** The SEM image of blank CF

The SEM image in Fig. S7 is bare Co foam for comparison with  $\text{Co}_4(\text{PW}_9)_2@\text{GDY}$  and  $\text{Co}_4(\text{PW}_9)_2$ .

### 3.8 The EDS elemental mapping of $\text{Co}_4(\text{PW}_9)_2@\text{GDY}$ by SEM

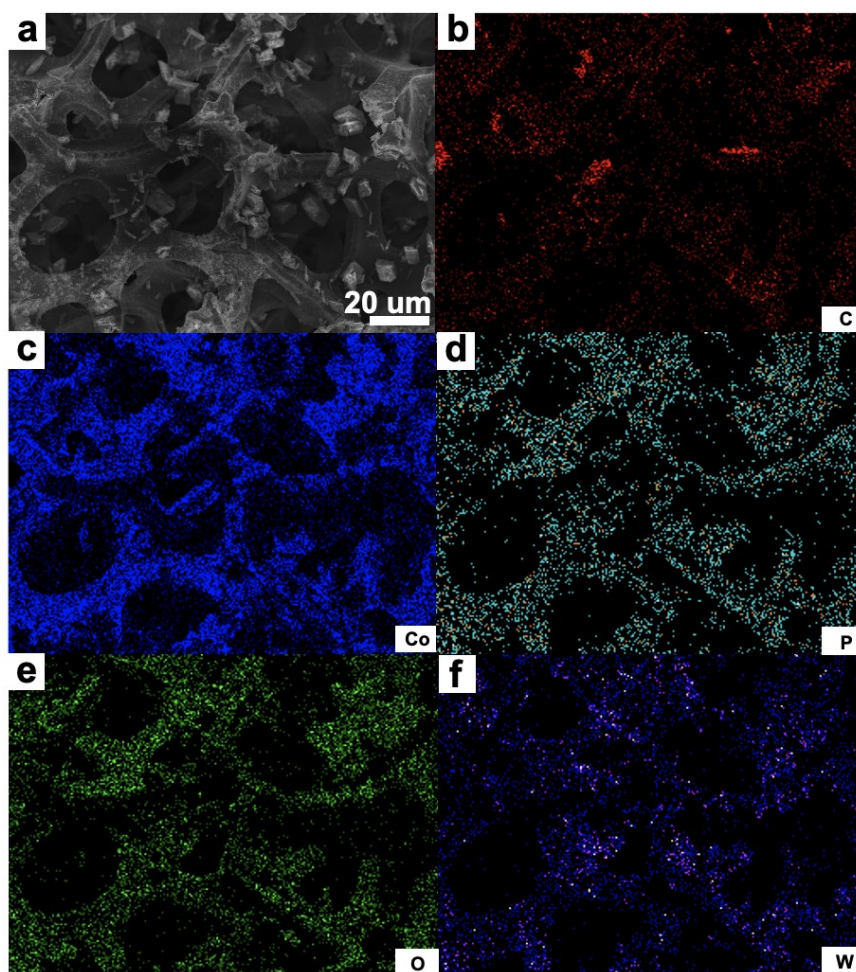

**Fig. S8.** (a) The SEM image of  $\text{Co}_4(\text{PW}_9)_2@\text{GDY}$  and corresponding element mapping of (b) C; (c) Co; (d) P; (e) O; (f) W

Fig. S8 shows the uniform distribution of different elements: C, Co, P, O and W in the composite cluster, which proves that  $\text{Co}_4(\text{PW}_9)_2@\text{GDY}$  was synthesized properly.

### 3.9 Supplementary of XPS spectrum

#### 3.9.1 Supplementary for $\text{Co}_4(\text{PW}_9)_2@\text{GDY}$

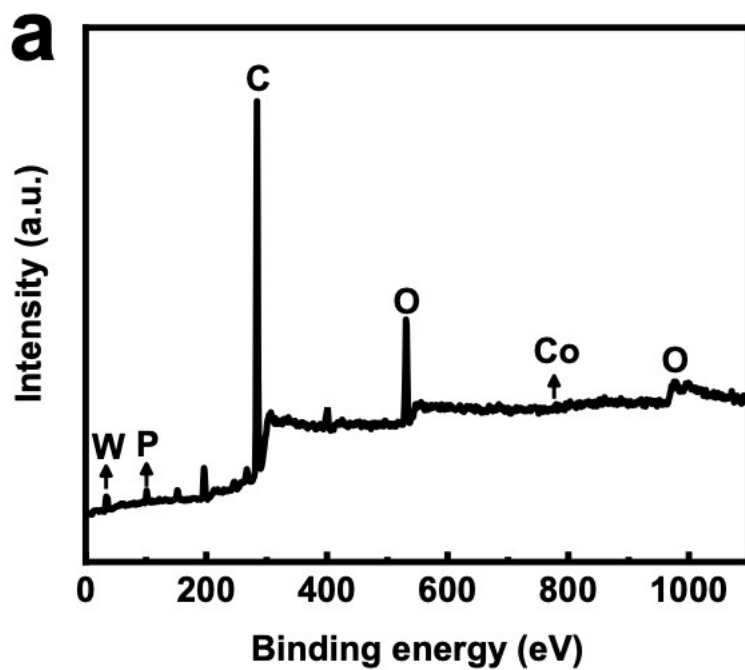

**Fig. S9.** XPS survey scan of  $\text{Co}_4(\text{PW}_9)_2@\text{GDY}$

The XPS survey scan is shown in Fig. S9, which exhibits the presence of W, P, C, O and Co, suggesting the coexistence of  $\text{Co}_4(\text{PW}_9)_2$  and GDY in composite cluster.



### 3.9.2 Supplementary for $\text{Co}_4(\text{PW}_9)_2$

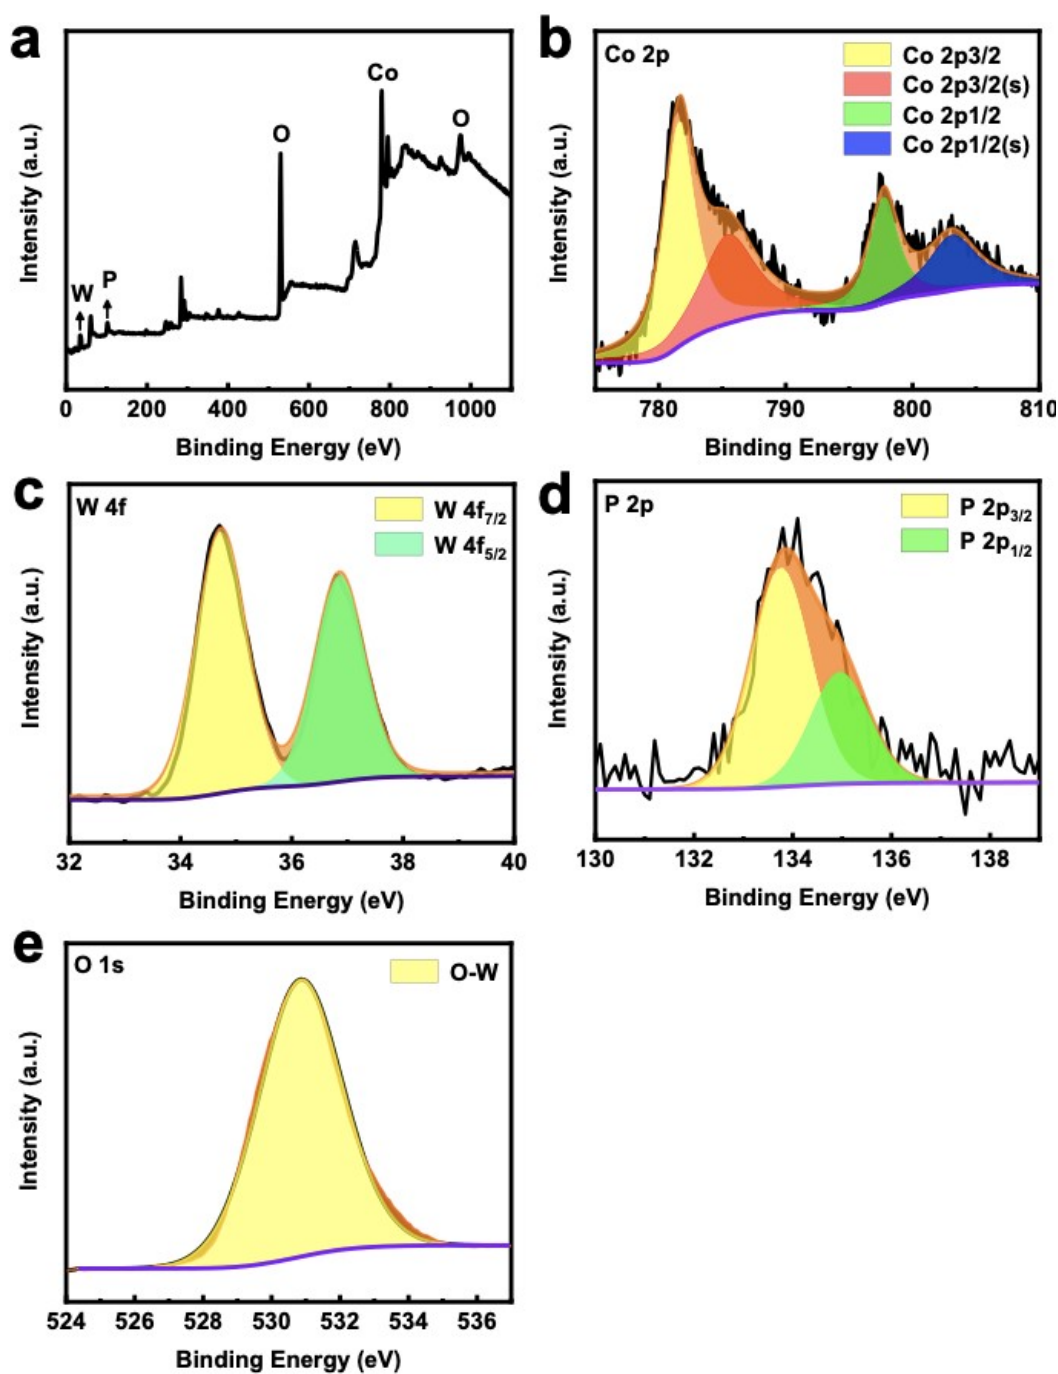

**Fig. S10.** (a) XPS survey spectrum of  $\text{Co}_4(\text{PW}_9)_2$ ; high-resolution XPS spectrum of (b) Co 2p, (c) W 4f; (d) P 2p; (e) O 1s in  $\text{Co}_4(\text{PW}_9)_2$

Fig. S10 provides XPS spectrum of  $\text{Co}_4(\text{PW}_9)_2$ . Fig. S10a shows the survey scan  $\text{Co}_4(\text{PW}_9)_2$ , which exhibits the presence of Co, W, P and O. Fig. S10b shows four main peaks that belong to  $\text{Co}^{2+}$  (2p), two of them are  $\text{Co}^{2+}$  2p<sub>3/2</sub> at 780.4 eV and  $\text{Co}^{2+}$  2p<sub>1/2</sub> at

796.1 eV and the others are satellites of  $\text{Co}^{2+} 2p_{3/2}$  and  $\text{Co}^{2+} 2p_{1/2}$  at 786.6 eV and 801.9 eV. Two binding energy at 35.8 eV and 37.0 eV in Fig. S9c could be assigned to  $\text{W}^{6+} 4f_{7/2}$  and  $\text{W}^{6+} 4f_{5/2}$ . A doublet induced by spin-orbital coupling can be resolved in Fig. S10d is exclusive for  $\text{P}^{4+} 2p$ , the corresponding binding energy of  $\text{P}^{4+} 2p_{3/2}$  and  $\text{P}^{4+} 2p_{1/2}$  are 133.7 eV and 134.9 eV. A single peak at 530.8 eV is clearly shown in Fig. S10e which presents the O 1s in O-W bond in  $\text{Co}_4(\text{PW}_9)_2$ .

### 3.9.3 Supplementary for GDY

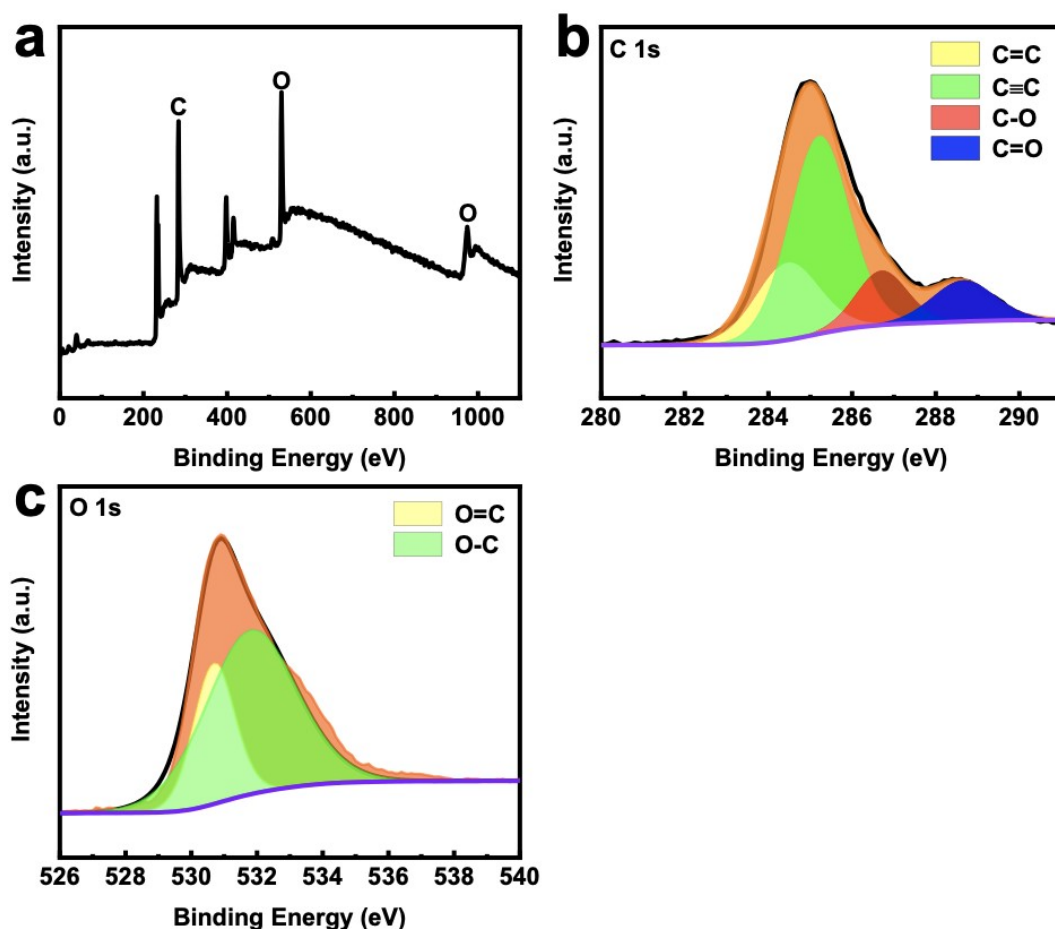

**Fig. S11.** (a) XPS survey spectrum of GDY; high-resolution XPS spectrum of (b) C 1s, (c) O 1s in GDY

We synthesized the all-carbon GDY individually and the product was also analyzed by XPS. Fig. S11a is XPS survey scan of GDY nanofilm, which exhibits the elements of C (1s) and O (1s). The high-resolution XPS spectra of C 1s in Fig. S11b shows peak at 284.8 eV, which can be deconvoluted into four peaks, corresponding to  $sp^2$  (C=C) at binding energy of 284.5 eV,  $sp$  (C≡C) at 285.2 eV, C-O at 286.7 eV and C=O at 288.9 eV, respectively. A single peak at 531.1 eV in Fig. S11c could be considered the superposition of two peaks at 530.7 eV and 531.8 eV which accord to O=C and O-C, respectively. The formation for single bond and double bond between Carbon and Oxygen are believed to be the adsorption of air. It is worth noting that the area of pale-

yellow section dwindles obviously in Fig. S11c when compared with Fig. 5f, which can be attributed to the similar binding energy of O 1s in O-W and in O=C, this result can also demonstrate the formation of W-O bond, further proof that  $\text{Co}_4(\text{PW}_9)_2$  was well prepared.

### 3.9.4 Supplementary for $\text{Co}_4(\text{PW}_9)_2@\text{GDY}$ -after cycling

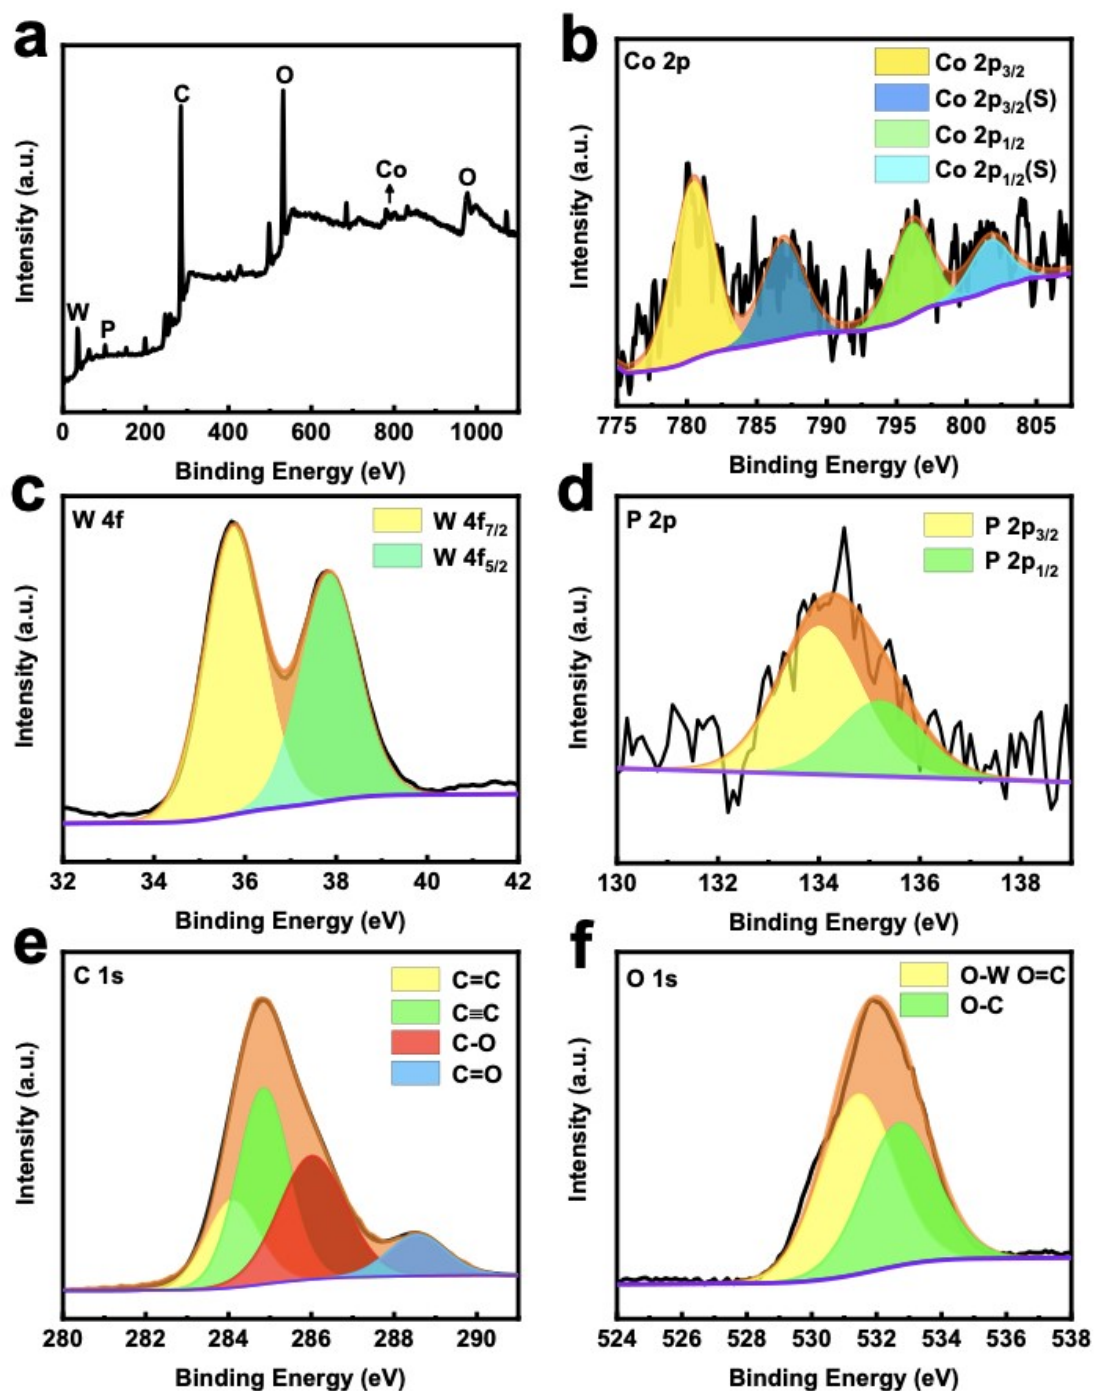

**Fig. S12.** (a) XPS survey spectrum of  $\text{Co}_4(\text{PW}_9)_2@\text{GDY}$ -after cycling; high-resolution XPS spectrum of (b) Co 2p, (c) W 4f, (d) P 2p, (e) C 1s and (f) O 1s in  $\text{Co}_4(\text{PW}_9)_2@\text{GDY}$ -after cycling

The composite electrode of  $\text{Co}_4(\text{PW}_9)_2@\text{GDY}$  were taken out of the cell and washed by ethanol in ultrasonic condition after cycling, the  $\text{Co}_4(\text{PW}_9)_2@\text{GDY}$  composite cluster fell from electrode was gathered and collected for XPS measurement. The results are shown in Fig. S12a, the survey scan of  $\text{Co}_4(\text{PW}_9)_2@\text{GDY}$ -after cycling shows the elements of W, P, C, O and Co and the binding energy of each element basically consistent with  $\text{Co}_4(\text{PW}_9)_2@\text{GDY}$  before cycling (Fig. S9), which represents the structural integrity of composite cluster was not destroyed during OER, suggesting the excellent electrochemical stability of  $\text{Co}_4(\text{PW}_9)_2@\text{GDY}$ .

Four characteristic peaks in Fig. S12b could be ascribed to  $\text{Co}^{2+}$  2p. The binding energy of  $\text{Co}^{2+}$  2p<sub>3/2</sub> and its satellite are 781.2 eV and 785.8 eV, the binding energy of  $\text{Co}^{2+}$  2p<sub>1/2</sub> and its satellite are 797.3 eV and 802.7 eV. Peak exhibited in Fig. S12c could be resolved into  $\text{W}^{6+}$  4f<sub>7/2</sub> and  $\text{W}^{6+}$  4f<sub>5/2</sub> doublets and their corresponding binding energy are 35.5 eV and 37.7 eV. Similarly, two signals could be observed in Fig. S12d at 133.9 eV and 135.1 eV which could be assigned to  $\text{P}^{4+}$  2p<sub>3/2</sub> and  $\text{P}^{4+}$  2p<sub>1/2</sub>. Fig. S12e depicts a peak at 284.9 eV, and it can be deconvoluted into sp<sup>2</sup> (C=C) at binding energy of 284.1 eV, sp (C≡C) at 284.9 eV, C-O at 286.0 eV and C=O at 288.6 eV. Finally, Fig. S12f illustrates a single peak at 531.9 eV and its resolved peaks are O-W and O=C at 531.4 eV, O-C at 532.7 eV.

### 3.10 Cyclic voltammetry (CV) curve for different electrodes

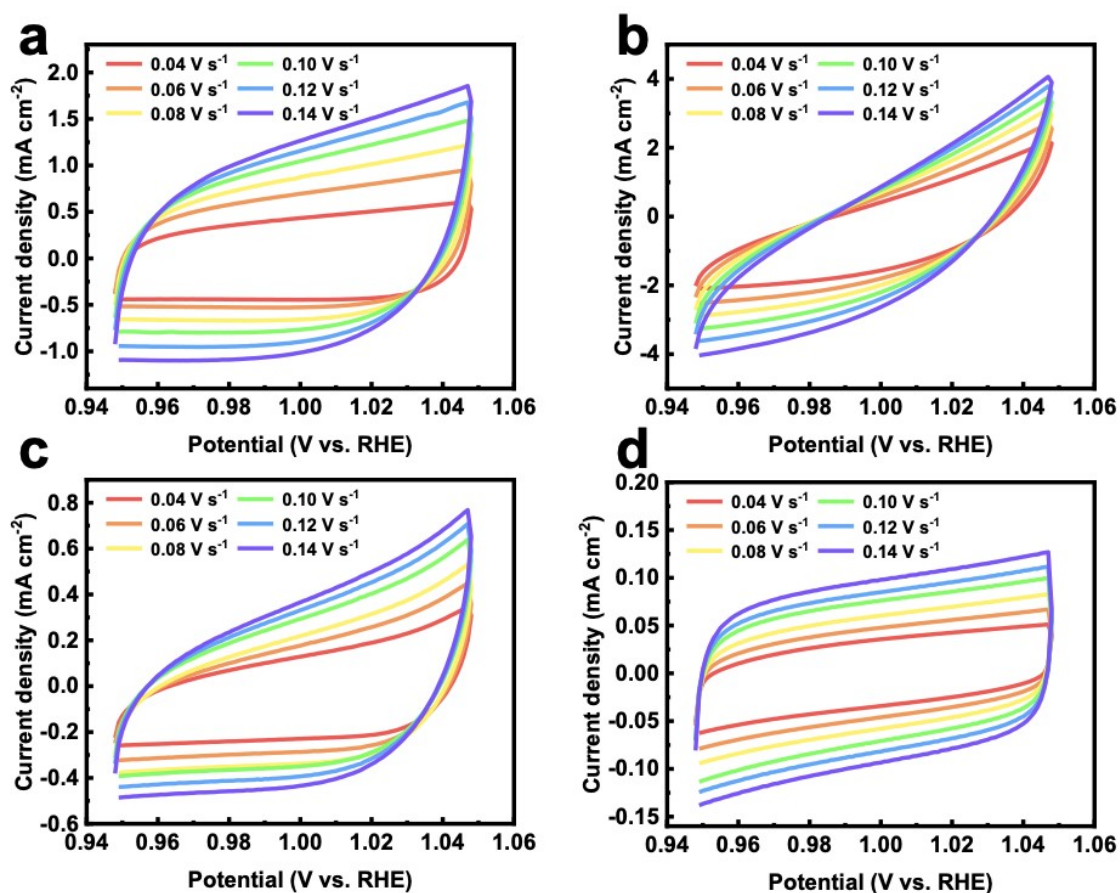

**Fig. S13.** CV curves of (a)  $\text{Co}_4(\text{PW}_9)_2@\text{GDY}$ , (b)  $\text{Co}_4(\text{PW}_9)_2$ , (c) GDY and (d) CF in the potential range of 0.96-1.04 V vs RHE at various scan rates (40-140  $\text{mV s}^{-1}$ ).

The CV curves in Fig. S13 of four electrodes are used for plotting the graphs of current density against the scan rate to calculate the  $C_{dl}$  at potential of 1.02 V (vs. RHE) in Fig. 6c. The ECSA of the catalyst was estimated from the electrochemical double-layer capacitance ( $C_{dl}$ ).  $C_{dl}$  was measured via CV curve with a potential range where no apparent Faradaic process was taking place. The double-layer charging current  $I_C$  can be related to the scan rates through Equation S1:

$$I_C = C_{dl} \times v \quad (\text{Equation S1})$$

Thus, plotting the charge current at a specific potential against various scan rates yields a straight line which slope is equal to  $C_{dl}$ . Subsequently, the ECSA can be obtained by Equation S2:

$$ECSA = \frac{C_{dl}}{C_s} \quad (\text{Equation S2})$$

where  $C_s$  is specific capacitance measured from ideally smooth, planar surfaces of the catalyst, the  $C_s$  value is 0.04 mF cm<sup>-2</sup> in 1 M KOH based on the typical reported values.<sup>[6]</sup>



### 3.11 Supplementary for TOF

|                                                           | Co <sub>4</sub> (PW <sub>9</sub> ) <sub>2</sub> @GDY | Co <sub>4</sub> (PW <sub>9</sub> ) <sub>2</sub> |
|-----------------------------------------------------------|------------------------------------------------------|-------------------------------------------------|
| Q <sub>redox</sub> in CV [C]                              | 0.018                                                | 0.009                                           |
| Moles of active sites [mol cm <sup>-2</sup> ]             | $9.32 \times 10^{-8}$                                | $4.66 \times 10^{-8}$                           |
| Total number of active sites [cm <sup>-2</sup> ]          | $5.61 \times 10^{16}$                                | $2.80 \times 10^{16}$                           |
| Current density at $\eta = 350$ mV [mA cm <sup>-2</sup> ] | 31.00                                                | 11.47                                           |
| TOF value at $\eta = 350$ mV [s <sup>-1</sup> ]           | 0.86                                                 | 0.63                                            |

**Table S2.** TOF and relevant parameters of composite electrode at overpotential 350 mV

The turnover frequency (TOF) was determined to better explore the intrinsic activity of the Co<sub>4</sub>(PW<sub>9</sub>)<sub>2</sub>@GDY and Co<sub>4</sub>(PW<sub>9</sub>)<sub>2</sub> in the OER by using the approach of redox peak integration of CV in static solution, which was calculated from the expression:

$$TOF = \frac{j \times S}{2 \times Q_{redox}} \quad (\text{Equation S3})$$

where  $j$  is current density at a certain overpotential,  $S$  is the area of nanocomposite electrode and  $Q_{redox}$  is the Faradaic charges when redox reaction occurs of the active sites and is calculated by the redox peaks under the baseline-corrected cyclic voltammetry.

### 3.12 SEM images of $\text{Co}_4(\text{PW}_9)_2@\text{GDY}$ after cycling

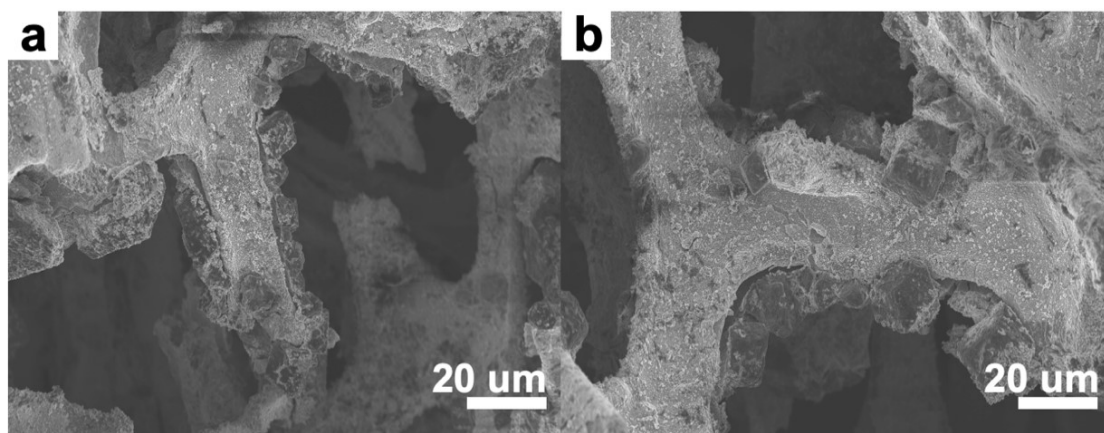

**Fig. S14.** (a) and (b) are the SEM images of  $\text{Co}_4(\text{PW}_9)_2@\text{GDY}$ -after OER cycling.

As shown in Fig. S14a and Fig. S14b, the morphology of  $\text{Co}_4(\text{PW}_9)_2@\text{GDY}$  after OER cycling unchanged which provides a joint proof with PXRD patterns in Fig. 6f that the  $\text{Co}_4(\text{PW}_9)_2@\text{GDY}$  electrode possesses relatively high stability and robustness.

### 3.13 Raman spectrum of $\text{Co}_4(\text{PW}_9)_2@\text{GDY}$ after cycling

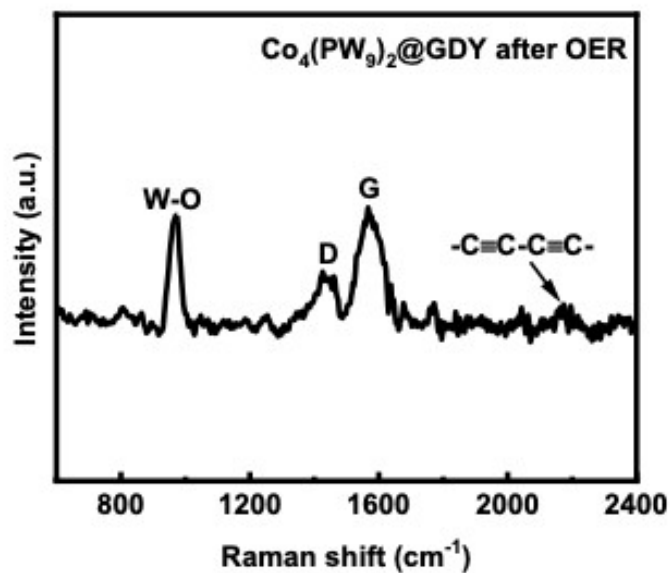

**Fig. S15.** Raman spectrum of  $\text{Co}_4(\text{PW}_9)_2@\text{GDY}$  after OER cycling.

As shown in Fig. S15, the Raman result of  $\text{Co}_4(\text{PW}_9)_2@\text{GDY}$  after OER suggesting the excellent electrochemical stability of composite cluster.

### 3.14 EIS and relating results

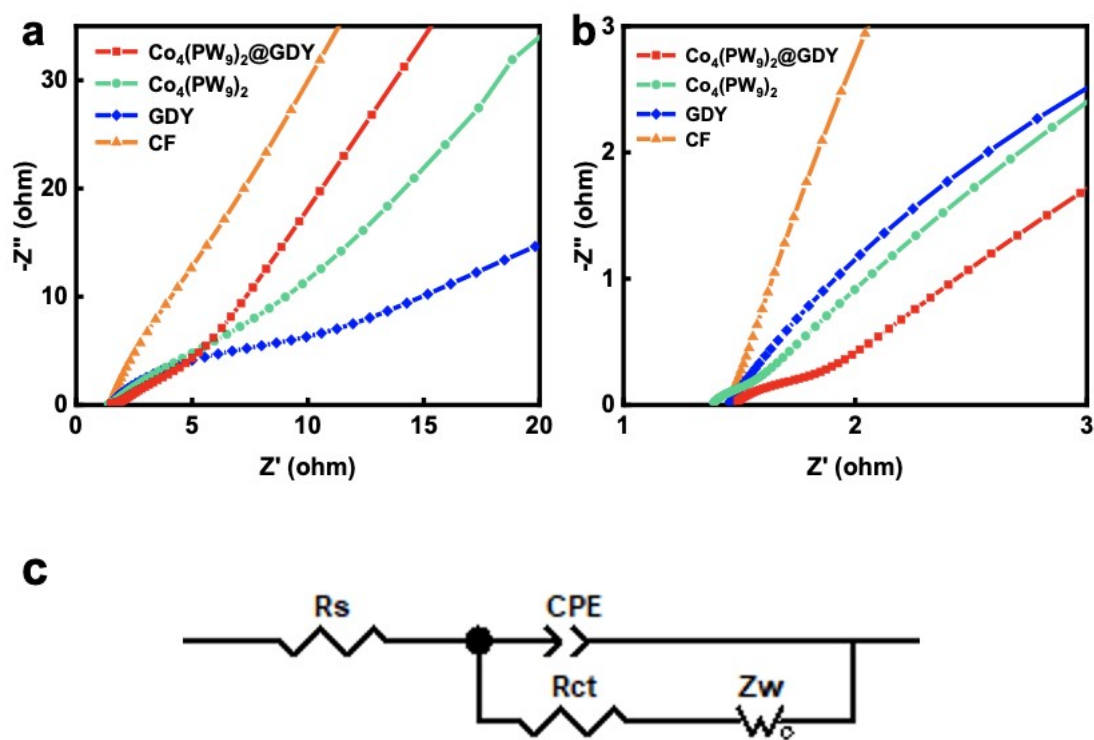

**Fig. S16.** (a) and (b) are Nyquist plots of the  $\text{Co}_4(\text{PW}_9)_2@\text{GDY}$ ,  $\text{Co}_4(\text{PW}_9)_2$ , GDY and CF in different scale; (c) the equivalent circuit model used for fitting

|                                         | $R_s$ ( $\Omega$ ) | $R_{ct}$ ( $\Omega$ ) |
|-----------------------------------------|--------------------|-----------------------|
| $\text{Co}_4(\text{PW}_9)_2@\text{GDY}$ | 1.49               | 0.70                  |
| $\text{Co}_4(\text{PW}_9)_2$            | 1.38               | 6.66                  |
| GDY                                     | 1.44               | 16.06                 |
| Co foam                                 | 1.46               | 73.08                 |

**Table S3.**  $R_s$  and  $R_{ct}$  value of  $\text{Co}_4(\text{PW}_9)_2@\text{GDY}$ ,  $\text{Co}_4(\text{PW}_9)_2$ , GDY and Co foam

### 3.15 ICP-OES results

ICP-OES was conducted to determine the content of Co, P, W in  $\text{Co}_4(\text{PW}_9)_2$  clusters, which were removed from the CF by ultrasonic. The element content could be found in Table S4. The ratio of Co, P, W is close to 4:2:18, corresponding to the ratio of content in  $\text{Co}_4(\text{PW}_9)_2$  formula.

**Table S4.** ICP-OES result for  $\text{Co}_4(\text{PW}_9)_2$

| elements | $\text{Co}_4(\text{PW}_9)_2$ |
|----------|------------------------------|
| Co       | 4.66%                        |
| P        | 2.23%                        |
| W        | 21.97%                       |



### 3.16 EDS elemental analysis

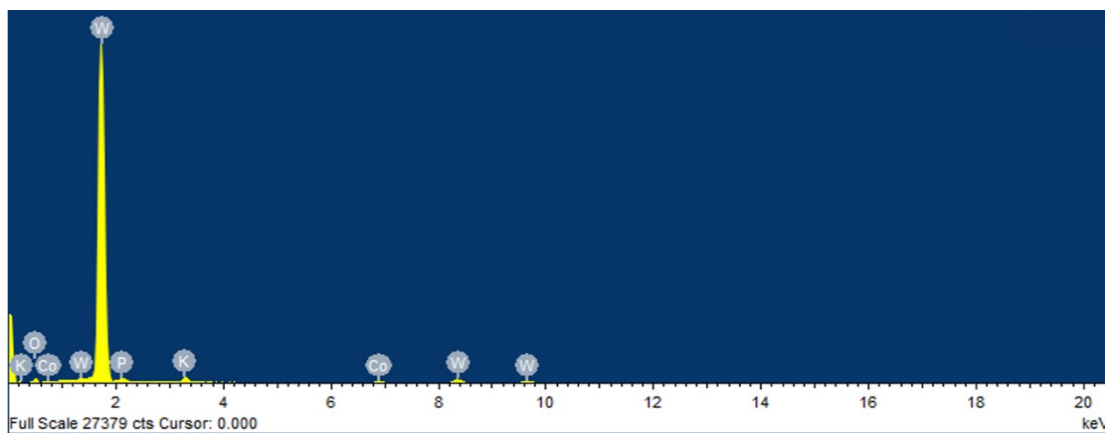

The elemental analysis results of  $\text{Co}_4(\text{PW}_9)_2$  are shown in Fig. S16-S17 and Table S5.

**Fig. S17.** Elemental analysis of  $\text{Co}_4(\text{PW}_9)_2$

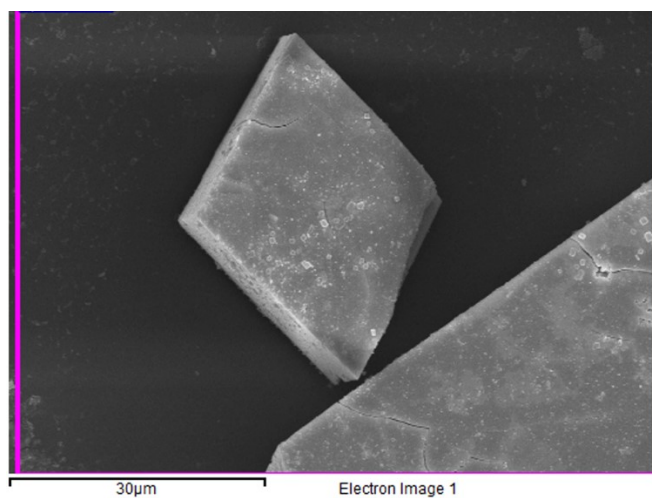

**Fig. S18.** Selected area of  $\text{Co}_4(\text{PW}_9)_2$  for EDS

**Table S5** element content in  $\text{Co}_4(\text{PW}_9)_2$ 

| Element | Weight% | Atomic% |
|---------|---------|---------|
| O K     | 18.67   | 64.22   |
| P K     | 1.21    | 2.19    |
| K K     | 7.33    | 9.80    |
| Co K    | 5.12    | 4.54    |
| W L     | 67.67   | 19.25   |
| Total   | 100     | 100     |

The EDS results as shown in Table S5, the element ratio and content of different are cosistent with  $\text{Co}_4(\text{PW}_9)_2$ .



The elemental analysis results of  $\text{Co}_4(\text{PW}_9)_2@\text{GDY}$  are shown in Fig. S18-S19 and Table S6.

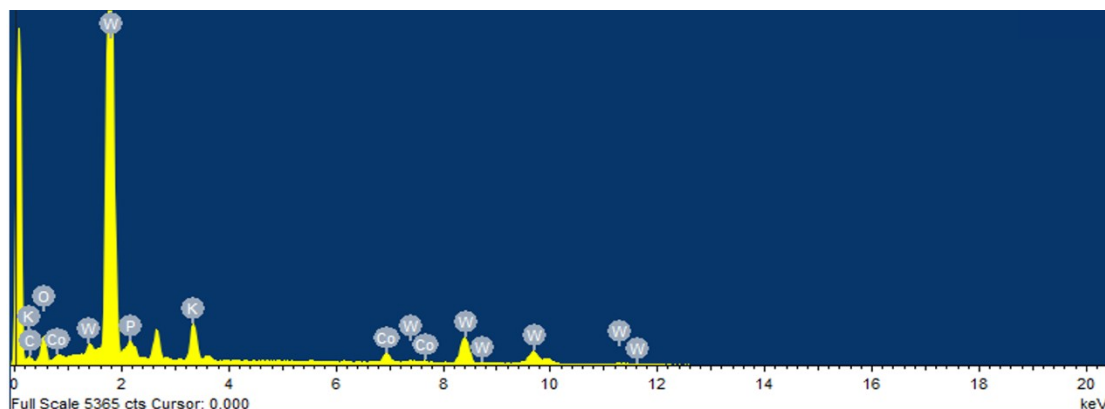

**Fig. S19.** Elemental analysis of  $\text{Co}_4(\text{PW}_9)_2@\text{GDY}$

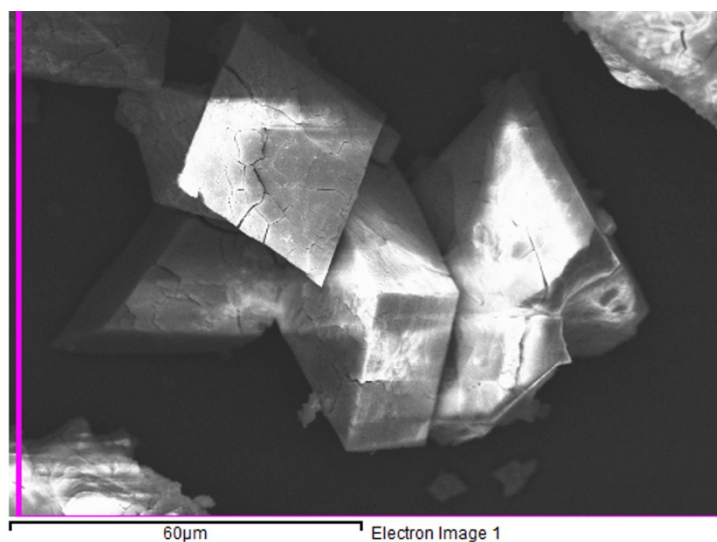

**Fig. S20.** Selected area of  $\text{Co}_4(\text{PW}_9)_2@\text{GDY}$  for EDS

**Table S6** element content in  $\text{Co}_4(\text{PW}_9)_2@\text{GDY}$ 

| Element | Weight% | Atomic% |
|---------|---------|---------|
| C K     | 0.33    | 1.43    |
| O K     | 18.46   | 63.34   |
| P K     | 1.12    | 2.03    |
| K K     | 8.83    | 10.33   |
| Co K    | 4.85    | 4.24    |
| W L     | 66.41   | 18.63   |
| Total   | 100     | 100     |

The EDS results as shown in Table S5 exhibit that the C content of  $\text{Co}_4(\text{PW}_9)_2@\text{GDY}$  is 1.43%.

### 3.17 Faraday efficiency (FE)

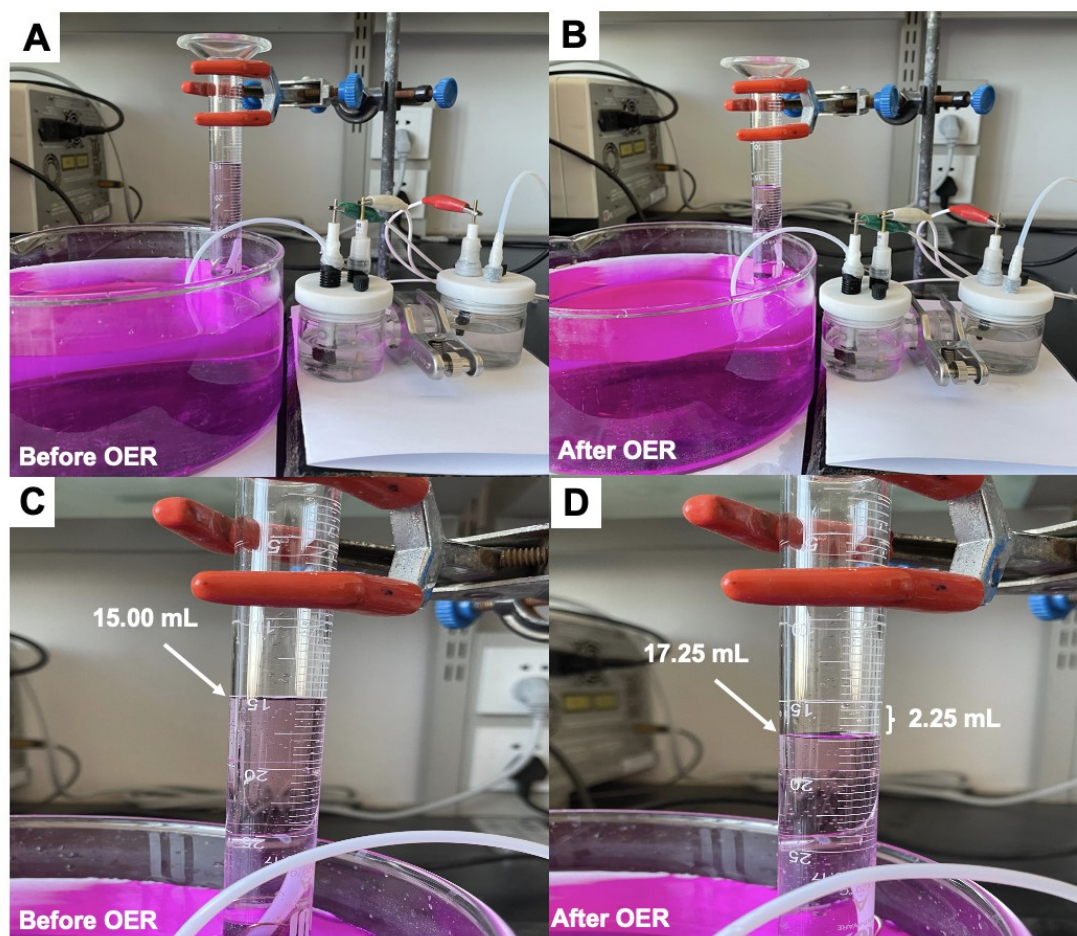

**Fig. S21.** (a) and (b) are H-cell and drainage and gas storage device before and after OER; (c) and (d) are partial magnification images that shows clearly about the scale of graduated cylinder before and after OER

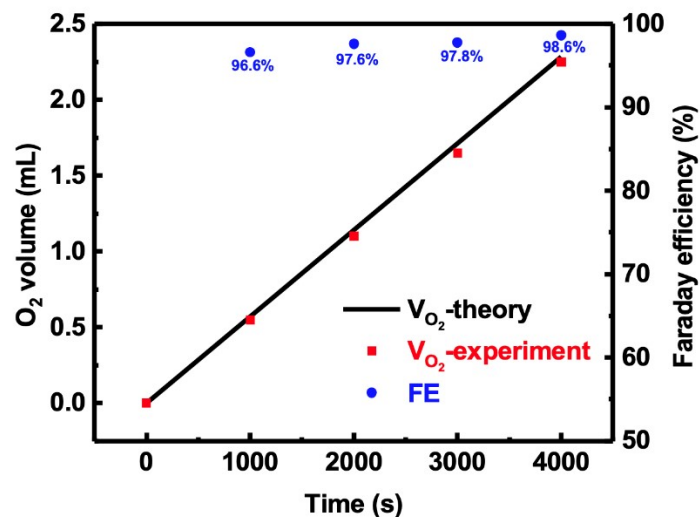

**Fig. S22.** The volume of  $O_2$  of experiment and theory, and corresponding Faraday efficiency at different time points.

FE were calculated according to the Equation S4-1 and Equation S4-2

$$FE = \frac{V(O_2 - \text{experiment})}{V(O_2 - \text{theory})} \quad (\text{Equation S4-1})$$

$$V(O_2 - \text{theory}) = \frac{Q_t}{4 \times F} \times V_m \times \frac{298K}{273K} \quad (\text{Equation S4-2})$$

$V(O_2\text{-experiment})$  were recorded at different time point (1000s, 2000s, 3000s and 4000s);  $Q_t$  is total charges at different time point, which was calculated according to the i-t curve from electrochemical workstation;  $F$  is Faraday constant,  $F=96485 \text{ C/mol}$ ;  $V_m$  is gas molar volume,  $V_m=22.4 \text{ L/mol}$ .

### 3.18 DFT calculation and model

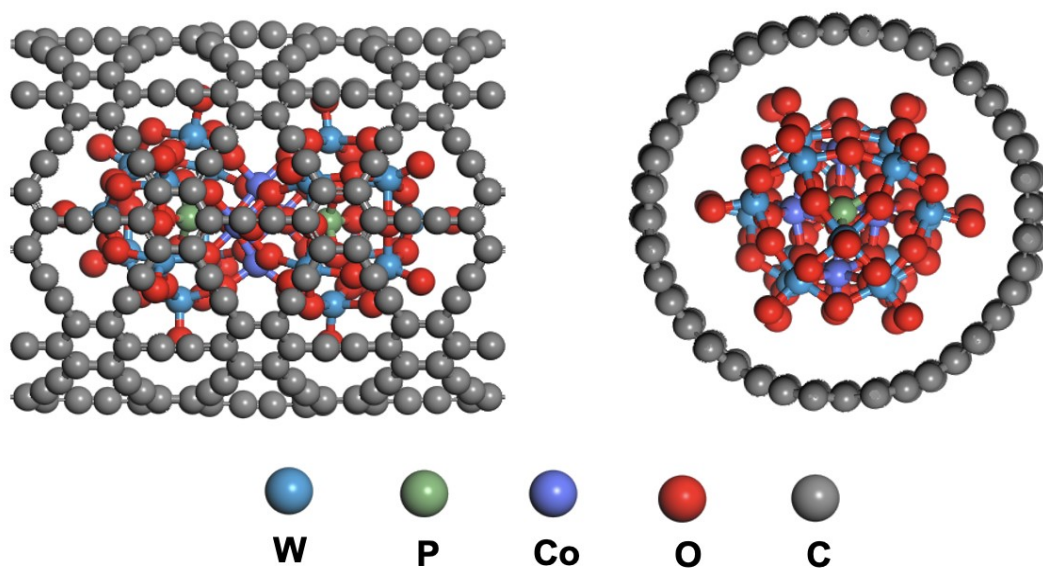

**Fig. S23.** The calculation model of  $\text{Co}_4(\text{PW}_9)_2@\text{GDY}$ , the monomer  $\text{Co}_4(\text{PW}_9)_2$  was encapsulated in GDY tube

For  $\text{Co}_4(\text{PW}_9)_2@\text{GDY}$ , a monomer of  $\text{Co}_4(\text{PW}_9)_2$  structure is encapsulated by a GDY tube (shown in Fig. S18). A vacuum layer as large as 12 Å was used along the direction of the surface normal to avoid periodic interactions. In all structural optimization calculations, all the atoms were allowed to relax. A vacuum layer as large as 10 Å was used along a and c directions to avoid periodic interactions.

The electrode is working under the potential in reality. To investigate the effect of the electric potential on the activity of OER, the free energy diagrams of OER is employed.<sup>[3]</sup> Free energy change from initial states to final states of the reaction is calculated as follows:

$$\Delta G = \Delta E + \Delta \text{ZPE} - T\Delta S + \Delta G_U + \Delta G_{pH} \quad (\text{Equation S5})$$

where  $\Delta E$  is the total energy change based on the DFT calculations,  $\Delta \text{ZPE}$  and  $\Delta S$  is the change in zero-point energy and in entropy, respectively,  $T$  is room temperature (298.15 K).  $\Delta G_U = -eU$ , where  $U$  is the electrode potential with respect to standard

hydrogen electrode, and  $e$  is the transferred charge. Since the results of the free energy diagrams are consistent in both  $\text{pH} = 0$  and  $\text{pH} = 14$ .<sup>[2]</sup> Thus, free energy change of  $\text{pH}$  ( $\Delta G_{\text{pH}} = k_B T \ln 10 \times \text{pH}$  where  $k_B$  is the Boltzmann constant) only employ the configuration of  $\text{pH} = 0$  in this work. The free energy of  $\text{H}_2\text{O}$  was estimated in the gas-phase with a pressure of 0.035 bar, which is the equilibrium vapor pressure of  $\text{H}_2\text{O}$  at 298.15 K. The free energy of  $\text{O}_2$  is obtained from the free energy change of the reaction  $\text{O}_2 + 2\text{H}_2 \rightarrow 2\text{H}_2\text{O}$ , which is -4.92 eV at 298.15 K and a pressure of 0.035 bar. The free energy of  $(\text{H}^+ + \text{e}^-)$  at standard conditions was assumed as the energy of  $1/2\text{H}_2$ .<sup>[4]</sup> The entropy of the  $\text{H}_2$  is taken from the NIST database, while the entropies of the OER intermediates were calculated from the vibrational frequencies.

### 3.19 Working potential to active sites in pure GDY

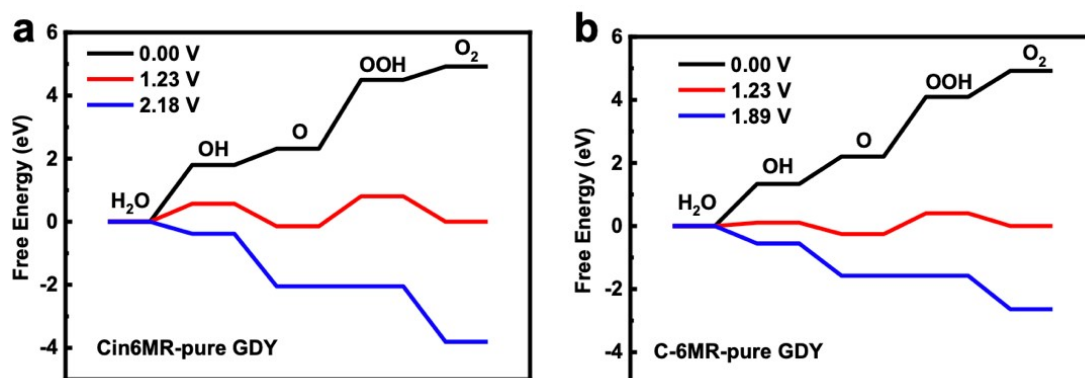

**Fig. S24.** The calculation model of  $\text{Co}_4(\text{PW}_9)_2@\text{GDY}$ , the monomer  $\text{Co}_4(\text{PW}_9)_2$  was encapsulated in GDY tube.

As shown in Figure S21, the applied working potential of Cin6MR and C-6MR in pure GDY is 2.18 V and 1.89 V (vs. RHE), which are higher than the same active sites in  $\text{Co}_4(\text{PW}_9)_2@\text{GDY}$ , Cin6MR for 2.13 V, Cin6MR' for 2.01 V and C-6MR for 1.78 V (vs. RHE).

**Table S7.** The free energy changes (in eV) for elementary reactions in OER with external potential of 0 V. The values in red indicates the potential-limiting step.

|                           | C-6MR-<br>Co <sub>4</sub> (PW <sub>9</sub> ) <sub>2</sub> @GDY | Cin6MR-<br>Co <sub>4</sub> (PW <sub>9</sub> ) <sub>2</sub> @GDY | Cin6MR'-<br>Co <sub>4</sub> (PW <sub>9</sub> ) <sub>2</sub> @GDY |
|---------------------------|----------------------------------------------------------------|-----------------------------------------------------------------|------------------------------------------------------------------|
| H <sub>2</sub> O →<br>*OH | 1.14                                                           | 1.69                                                            | 1.45                                                             |
| *OH →<br>*O               | 0.91                                                           | 0.59                                                            | 0.69                                                             |
| *O →<br>*OOH              | 1.78                                                           | 2.13                                                            | 2.01                                                             |
| *OOH →<br>O <sub>2</sub>  | 1.09                                                           | 0.51                                                            | 0.76                                                             |



### 3.20 Comparison for different active sites

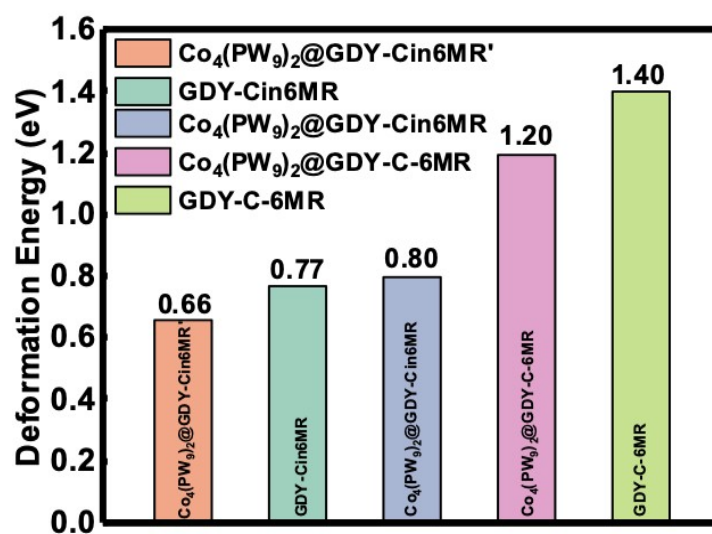

**Fig. S25.** Comparison of deformation energy for C-6MR, Cin6MR and Cin6MR' active sites in  $\text{Co}_4(\text{PW}_9)_2@\text{GDY}$  and C-6MR, Cin6MR active sites in GDY.

### 3.21 Images of different electrodes under optical microscope

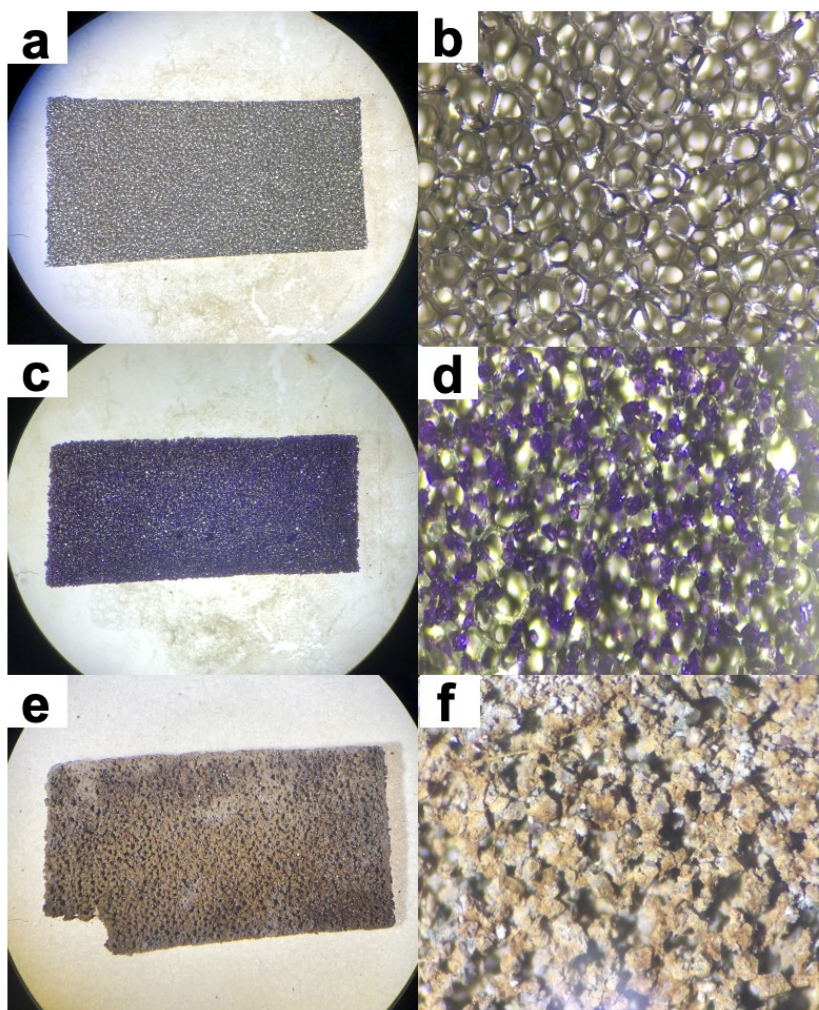

**Fig. S26.** (a) and (b) are the images of blank Co foam under the optical microscope; (c) and (d) are the images of  $\text{Co}_4(\text{PW}_9)_2$  microcrystal deposited in Co foam under the optical microscope; (e) and (f) are the images of core-shell structure of  $\text{Co}_4(\text{PW}_9)_2@\text{GDY}$  loaded on Co foam under the optical microscope.

### 3.22 Comparson of OER performance

**Table S8.** Literature survey on potential and Tafel slope of the Co-based nanostructures for OER.

| Electrocatalysts                                                                                                            | Electrolyt<br>e | $j$<br>[mA<br>cm <sup>-2</sup> ] | potential<br>(V vs<br>RHE)           | Tafel<br>slop<br>(mV dec <sup>-1</sup> ) | References       |
|-----------------------------------------------------------------------------------------------------------------------------|-----------------|----------------------------------|--------------------------------------|------------------------------------------|------------------|
| Co <sub>4</sub> (PW <sub>9</sub> ) <sub>2</sub> @<br>GDY/CF                                                                 | 1.0 M<br>KOH    | 10<br>20<br>50<br>100<br>200     | 1.52<br>1.56<br>1.59<br>1.62<br>1.66 | 80                                       | <i>this work</i> |
| Wire-like<br>MoS <sub>2</sub> /Fe-<br>NiCo <sub>2</sub> O <sub>4</sub>                                                      | 1.0 M<br>NaOH   | 10                               | 1.54                                 | 42                                       | 5                |
| [Co <sub>6.8</sub> Ni <sub>1.2</sub> W <sub>12</sub> O <sub>42</sub><br>(OH) <sub>4</sub> (H <sub>2</sub> O) <sub>8</sub> ] | 0.1 M<br>KOH    | 10                               | 1.59                                 | 126                                      | 6                |
| CoO/Co <sub>3</sub> O <sub>4</sub>                                                                                          | 1.0 M<br>KOH    | 10                               | 1.50                                 | 55                                       | 7                |
| Co <sub>3</sub> O <sub>4</sub> /N-<br>graphene                                                                              | 1.0 M<br>KOH    | 10                               | 1.54                                 | 67                                       | 8                |
| CoNi1@C                                                                                                                     | 1.0 M<br>KOH    | 10                               | 1.57                                 | 55                                       | 9                |
| NiCo <sub>2</sub> O <sub>4</sub> @MnO <sub>2</sub>                                                                          | 1.0 M           | 10                               | 1.57                                 | 89                                       | 10               |

|                                                     |              |    |      |    |           |
|-----------------------------------------------------|--------------|----|------|----|-----------|
| core-shell<br>nanoarray                             | KOH          |    |      |    |           |
| NiCo <sub>2</sub> O <sub>4</sub> /rGO               | 0.1 M<br>KOH | 10 | 1.68 | 53 | <i>11</i> |
| NiCo <sub>2</sub> O <sub>4</sub> /NiO<br>nanosheets | 1.0 M<br>KOH | 10 | 1.60 | 61 | <i>12</i> |
| CoP/MoP@NC                                          | 1.0 M<br>KOH | 10 | 1.50 | 81 | <i>13</i> |
| Fe-NiCo <sub>2</sub> O <sub>4</sub><br>nanowire     | 1.0 M<br>KOH | 10 | 1.58 | 27 | <i>14</i> |

## References

- [1] G. Li, Y. Li, H. Liu, Y. Guo, Y. Li, D. Zhu, *Chem. Commun.*, 2010, **46**, 3256.
- [2] M. Sonoda, A. Inaba, K. Itahashi, Y. Tobe, *Org. Lett.*, 2001, **3**, 2419.
- [3] J. K. Nørskov, J. Rossmeisl, A. Logadottir, L. Lindqvist, J. R. Kitchin, T. Bligaard, H. Jónsson, *J. Phys. Chem. B*, 2004, **108**, 17886.
- [4] M. Jiao, W. Song, K. Li, Y. Wang, Z. J. Wu, *J. Phys. Chem. C*, 2016, **120**, 8804.
- [5] J. Li, D. Chu, H. Dong, D. R. Baker, R. Jiang, *J. Am. Chem. Soc.*, 2020, **142**, 50.
- [6] W. Luo, J. Hu, H. Diao, B. Schewarz, C. Streb. Y. F. Song, *Angew. Chem. Int. Ed.*, 2017, **56**, 4941.
- [7] D. He, X. Song, W. Li, C. Tang, J. Liu, Z. Ke, C. Jiang, X. Xiao, *Angew. Chem. Int. Ed.*, 2020, **132**, 6996.
- [8] Y. Liang, Y. Li, H. Wang, J. Zhou, J. Wang, T. Regier, H. Dai, *Nat. Mater.*, 2011, **10**, 780.
- [9] X. Zhang, J. Luo, K. Wan, D. Plessers, B. Sels, J. Song, L. Chen, T. Zhang, P. Tang, J. R. Morante, J. Arbiol, J. Fransaer, *J. Mater. Chem. A*, 2019, **7**, 1616.
- [10] H. Xue, H. Yu, Y. Li, K. Deng, Y. Xu, X. Li, H. Wang, L. Wang, *Nanotechnology*, 2018, **29**, 22085401.
- [11] E. Umeshbabu, G. Rajeshkhanna, P. Justin, G. R. Rao, *J. Soild State Electrochem.*, 2016, **20**, 2725.
- [12] C. Mahala, M. Basu, *ACS Omega*, 2017, **2**, 7559.
- [13] Y. J. Tang, H. J. Zhu, L. Z. Dong, A. M. Zhang, S. L. Li, J. Liu, Y. Q. Lan, *Appl. Catal. B-Environ.*, 2019, **245**, 528.
- [14] K. L. Yan, X. Shang, Z. Li, B. Dong, X. Li, W. K. Gao, J. C. Chi, Y. M. Chai, C. G. Liu, *Appl. Surface Sci.*, 2017, **416**, 371.
